# Supplementary material for: Improving transcriptome de novo assembly by using a reference genome of a related species: Translational genomics from oil palm to coconut
Source: PLoS One. 2017 Mar 23;12(3):e0173300. doi: 10.1371/journal.pone.0173300 (PMC5363918; doi:10.1371/journal.pone.0173300)
Supplement: S1 Table — The table shows the number of contigs (QC) or polypeptides (QP) obtained at each step of the workflow, as well as the sensitivity and specificity analysis in Arabidopsis thaliana using Arabidopsis lyrata and Capsella rubella as reference species. Results are indicated for several filtering parameters, indicated as three digits: the first represents the identity, the second the coverage for target polypeptides covering more than 40% of the protein of expected group, and the last is the coverage of polypeptides covering 40% or less of the protein of the expected group. The filtering parameters retained for coconut are highlighted in yellow. (XLSX) [file pone.0173300.s001.xlsx]

## Sheet: Feuil1
Results of workflow in A. thaliana by varying filtering parameters in the step 4
Arabidopsis Lyrata
Parameters	Step 1 (QC)	Step 2 (QP)	Step 3 (QP)	Step 4 (QP)	Step 5 (QP)	"Expected group"	True positive	False positive	False negative	Sensitivity	Specificity
0/0/0	121076	101688	101058	101058	22806	22015	18755	4051	3260	0.851919	0.822371
80/10/20	121076	101688	81858	81858	20410	22015	19372	1038	2643	0.879945	0.949143
80/20/30	121076	101688	81360	81360	20334	22015	19373	961	2642	0.879991	0.952739
80/30/40	121076	101688	80759	80759	20281	22015	19369	912	2646	0.879809	0.955032
80/40/50	121076	101688	79914	79914	20191	22015	19366	825	2649	0.879673	0.95914
80/50/60	121076	101688	78885	78885	20090	22015	19370	720	2645	0.879855	0.964161
80/60/70	121076	101688	77550	77550	19955	22015	19370	585	2645	0.879855	0.970684
80/65/75	121076	101688	76580	76580	19851	22015	19335	516	2680	0.878265	0.974006
80/70/80	121076	101688	75230	75230	19722	22015	19276	446	2739	0.875585	0.977386
80/75/85	121076	101688	73388	73388	19534	22015	19134	400	2881	0.869135	0.979523
Capsella rubella
Parameters	Step 1 (QC)	Step 2 (QP)	Step 3 (QP)	Step 4 (QP)	Step 5 (QP)	"Expected group"	True positive	False positive	False negative	Sensitivity	Specificity
0/0/0	121076	101688	100959	100959	22797	20200	17114	5683	3086	0.847228	0.750713
80/10/20	121076	101688	74327	74327	19015	20200	17595	1420	2605	0.87104	0.925322
80/20/30	121076	101688	73880	73880	18953	20200	17838	1115	2362	0.883069	0.94117
80/30/40	121076	101688	73370	73370	18906	20200	17839	1067	2361	0.883119	0.943563
80/40/50	121076	101688	72691	72691	18816	20200	17838	978	2362	0.883069	0.948023
80/50/60	121076	101688	71864	71864	18741	20200	17842	899	2358	0.883267	0.95203
80/60/70	121076	101688	70808	70808	18615	20200	17850	765	2350	0.883663	0.958904
80/65/75	121076	101688	70007	70007	18516	20200	17790	726	2410	0.880693	0.960791
80/70/80	121076	101688	68869	68869	18384	20200	17709	675	2491	0.876683	0.963283
80/75/85	121076	101688	67211	67211	18182	20200	17535	647	2665	0.868069	0.964415
Note.
Parameters	Identity/coverage query (Coverage target >40%)/coverage query (coverage target < 40%)
QC	Number of contigs
QP	Number of polypeptides
