# Supplementary material for: Improving transcriptome de novo assembly by using a reference genome of a related species: Translational genomics from oil palm to coconut
Source: PLoS One. 2017 Mar 23;12(3):e0173300. doi: 10.1371/journal.pone.0173300 (PMC5363918; doi:10.1371/journal.pone.0173300)
Supplement: S2 Table — The table represents the amount of polypeptides that change or maintain the coverage rank (BLASTP alignment) of the respective proteins of Arabidopsis thaliana of TAIR10, between step 4 and 5 of the methodology using Arabidopsis lyrata as a reference species. (XLSX) [file pone.0173300.s002.xlsx]

## Sheet: Feuil1
Amount of proteins that change coverage range by applying step 5 in Arabidopsis thaliana using Arabidopsis lyrata as reference
			Step 5
	Step 4		[0, 20[	[20,40[	[40,60[	[60,80[	[80,100[	100	Total
		[0, 20[	537	60	17	3	0	2	619
		[20, 40[	75	753	146	90	61	46	1171
		[40, 60[	18	45	516	123	193	326	1221
		[60, 80[	5	5	2	546	251	550	1359
		[80,100[	2	1	2	6	4168	557	4736
		100	5	1	5	3	77	10745	10836
		Total	642	865	688	771	4750	12226	19942
